# Supplementary material for: Online monitoring of the hygromechanical properties of spruce tracheid cell walls at the nanoscale
Source: Research Square preprint supplement (doi:10.21203/rs.3.rs-8132624/v1), 2025-12-15
Supplement: Supplementary file 1 [file 573a506095a9ecd3cfecf0c6.docx]

**Supplementary material**

Online monitoring of the hygromechanical properties of spruce tracheid cell walls at the nanoscale

Raphaël Coste1 · Véronique Aguié–Béghin1 · Hugues Clivot1 · Dominique Derome3 · Michaël Molinari2 · Brigitte Chabbert1*

1 Université de Reims Champagne Ardenne, INRAE, FARE, UMR A 614, Reims, France

2 CBMN UMR CNRS 5248, University of Bordeaux, IPB, Pessac, France

3 Department of Civil and Building Engineering, Université de Sherbrooke, Sherbrooke, J1K 2R1, Québec, Canada

*e-mail: brigitte.chabbert@inrae.fr


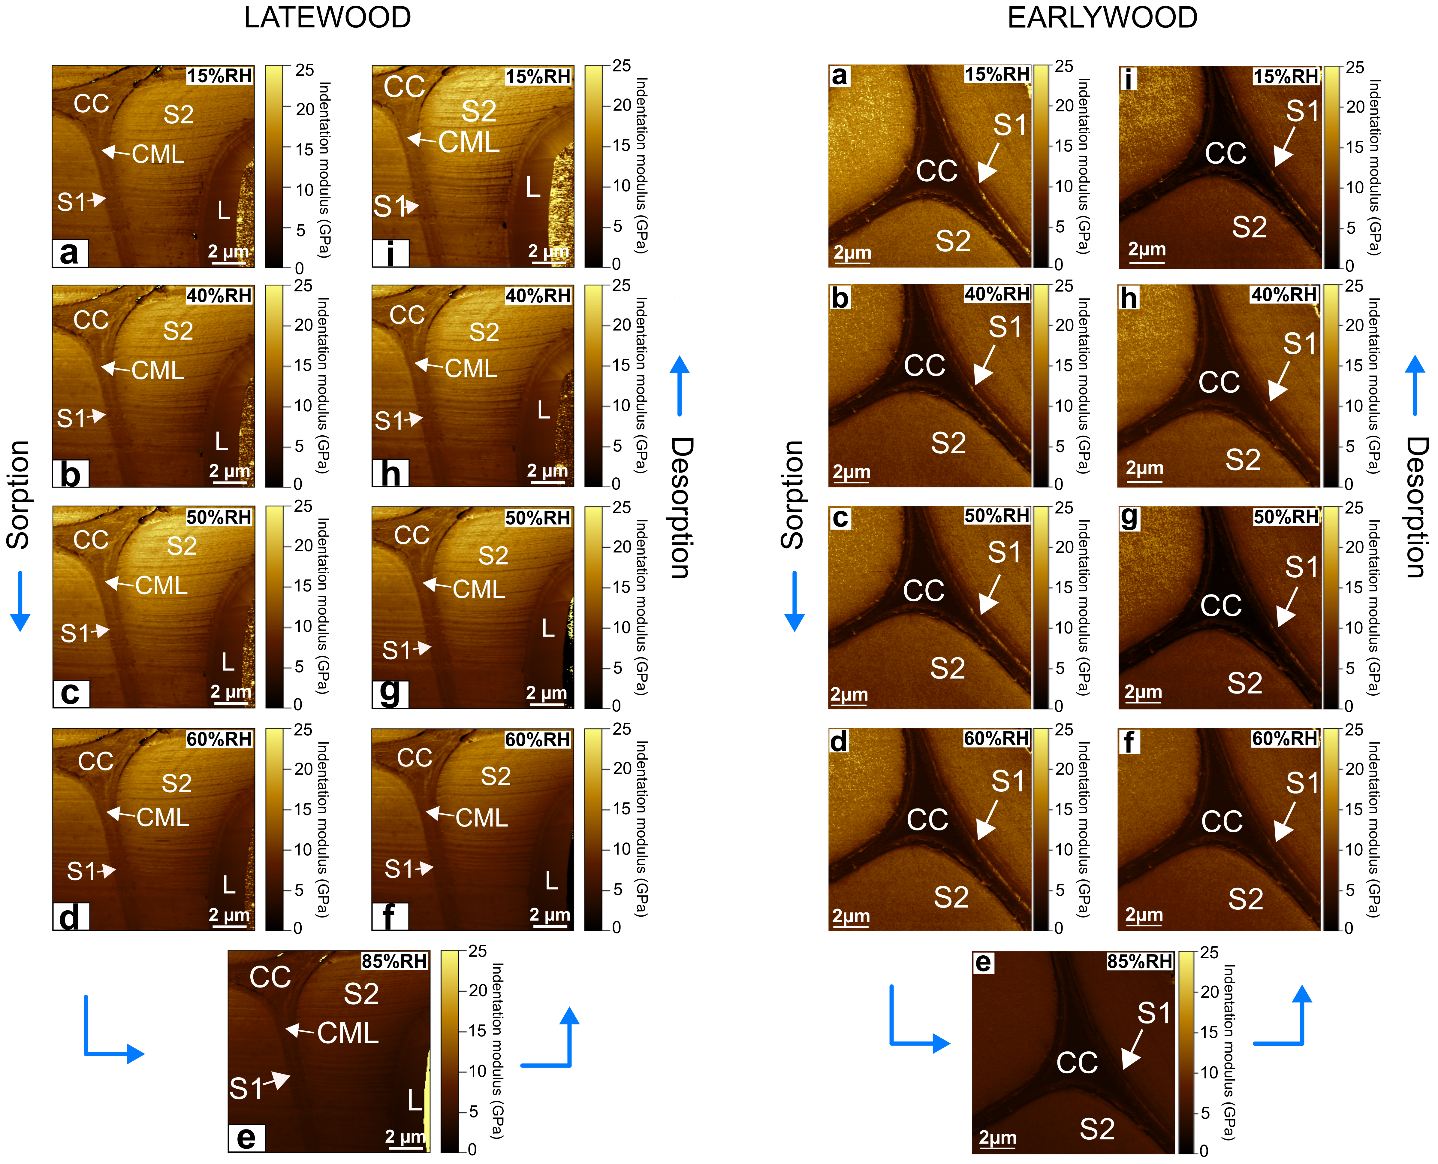


**Supplementary figure 1 :** AFM indentation moduli maps of latewood and earlywood obtained at each of the RH during cycle 3 (sorption and desorption)


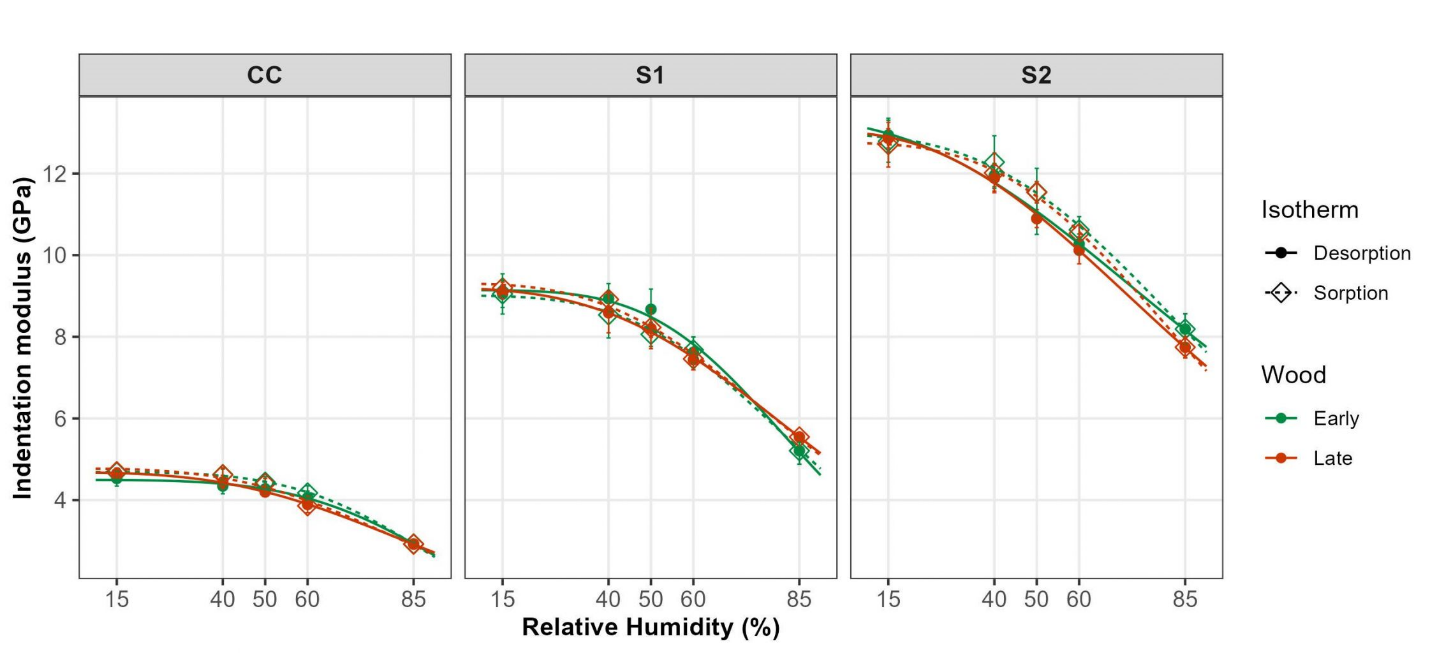


**Supplementary figure 2:** Fitting ofthe responses of the indentation moduli to relative humidity according to a three parameter logistic function
